# Supplementary material
Source: PubMed Central journal article supplement (PMC7211627)
Supplement: mmc1.pdf [file mmc1.pdf]

**Current Biology, Volume 30**

**Supplemental Information**

**A Novel Bat Coronavirus Closely Related  
to SARS-CoV-2 Contains Natural Insertions  
at the S1/S2 Cleavage Site of the Spike Protein**

**Hong Zhou, Xing Chen, Tao Hu, Juan Li, Hao Song, Yanran Liu, Peihan Wang, Di Liu, Jing Yang, Edward C. Holmes, Alice C. Hughes, Yuhai Bi, and Weifeng Shi**

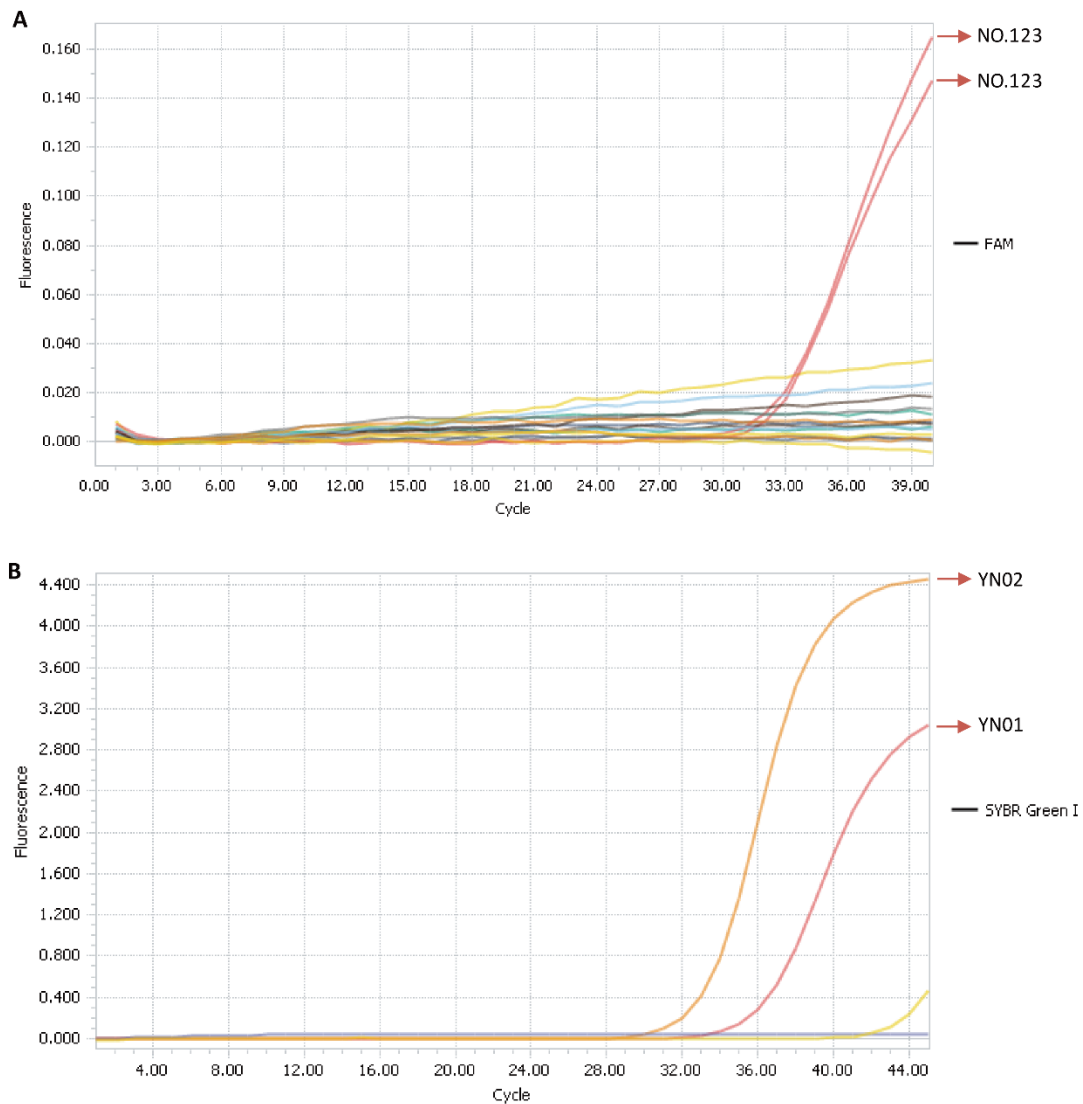

**Figure S1. Detection of RmYN02 using real-time PCR primers and Taqman probes in the eight fecal samples from pool 39, related to Sanger sequencing of STAR Methods. Two replicates were set for each original sample. (A) TaqMan-based qPCR was performed to detect the existence of RmYN02 in the eight additional feces samples of pool 39. Two replicates were set for each original sample. (B) RmYN01 and RmYN02 were identified in sample 123 using Tip green supermix (TransGen). Nuclease-free water was used as negative control.**

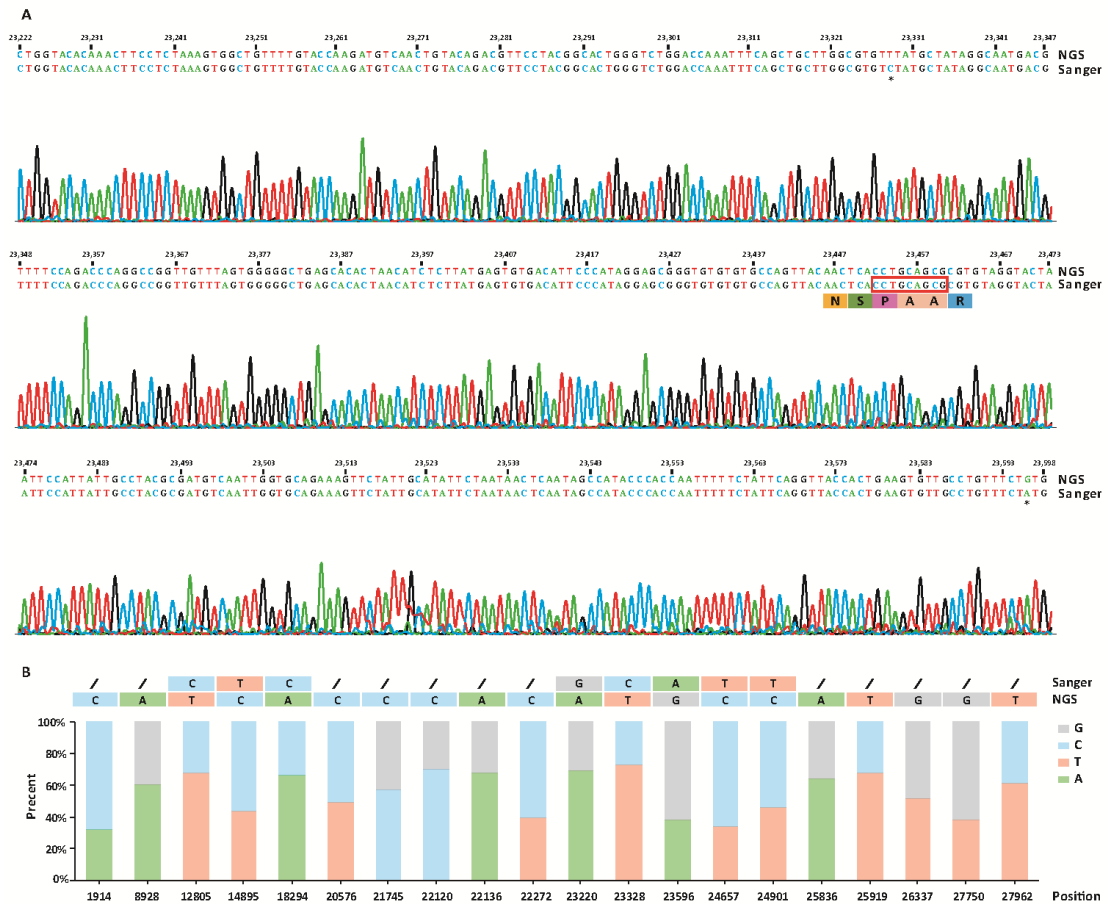

**Figure S2. Comparison of NGS consensus and Sanger sequencing of RmYN02, related to Figure 2 and Genome assembly and annotation of STAR Methods.** (A) NGS consensus and Sanger sequencing results of the RBD and the cleavage site of RmYN02. The insertion of the multiple amino acids at the S1/S2 cleavage site is highlighted. (B) Sites in the RmYN02 genome that display nucleotide polymorphisms in the NGS data. The positions of these sites in RmYN02 were provided at the bottom of the figure. “/”: Sanger sequencing was not performed.

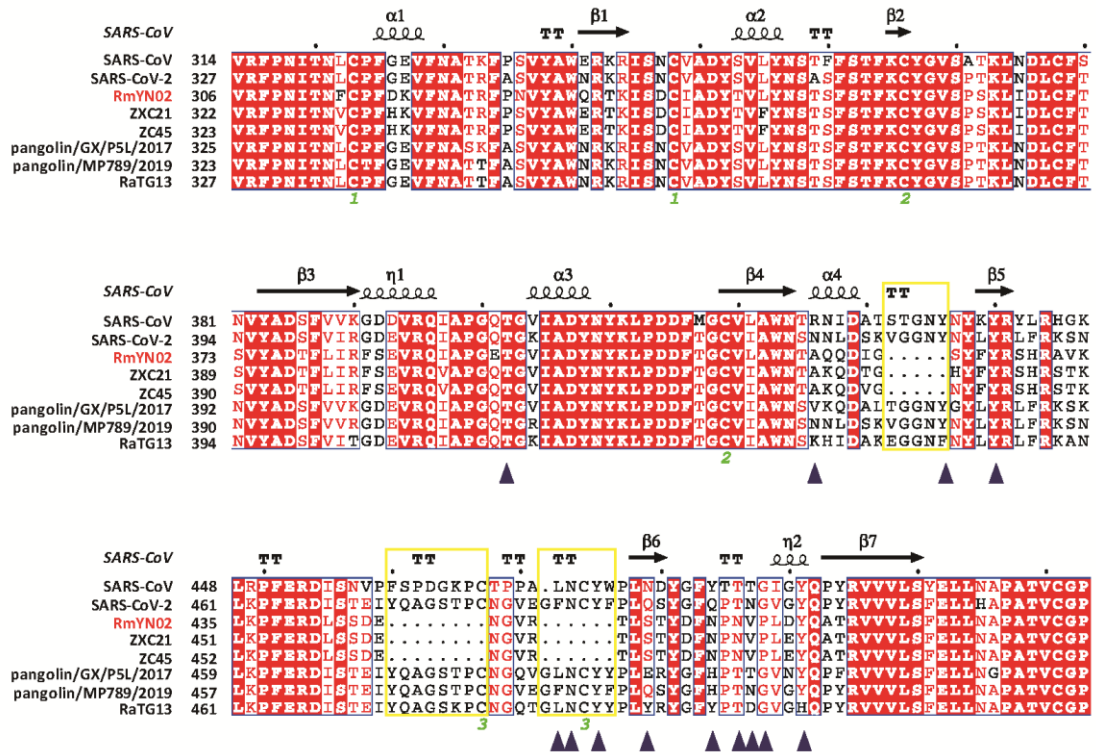

Figure S3. Sequence alignment of the RBDs from RmYN02 and representative beta-CoVs, related to Figure 2. The blue triangles indicate amino acids from the SARS-CoV S protein that impact binding to ACE2. The yellow rectangles highlight the three deletions in sequence resulting two loops shorter in RmYN02.

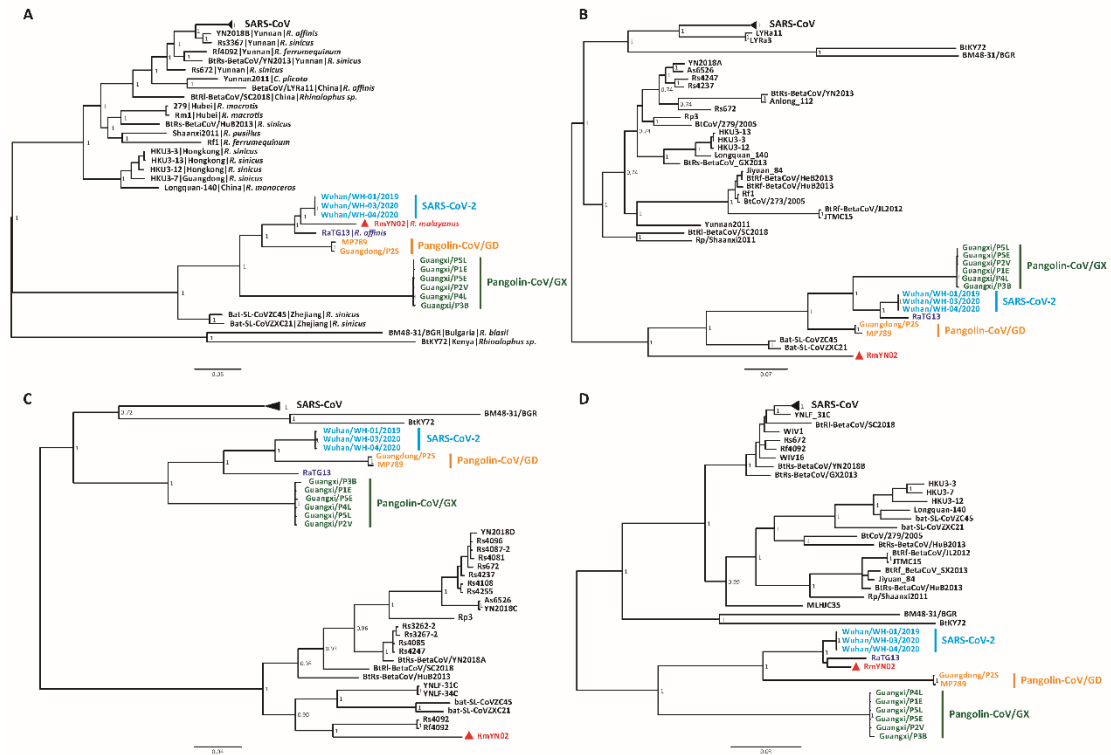

**Figure S4. Bayesian phylogenetic analysis of SARS-CoV-2 and representative viruses of the subgenus *Sarbecoronavirus*, related to Figure 3.** (A) Phylogenetic tree of the full-length virus genome. (B) the spike gene. (C) the RBD. (D) the RdRp gene. Phylogenetic analysis was also performed using MrBayes, employing the GTR nucleotide substitution model. Ten million steps were run, with trees and parameters sampled every 1,000 steps. The tree is midpoint rooted for clarity. RBD is delimited as the gene region 991-1572 of the spike gene according to the reference [6].

| Species                                                     | Individual number |     |     |     |     |     |         | Number<br>of<br>Libraries | Sample number                    |             |      |       |       |
|-------------------------------------------------------------|-------------------|-----|-----|-----|-----|-----|---------|---------------------------|----------------------------------|-------------|------|-------|-------|
|                                                             | May               | Jun | Jul | Aug | Sep | Oct | May-Oct |                           | Samples<br>per library           | Patagi<br>m | Lung | Liver | Feces |
| <i>Rhinolophus<br/>malayanus</i> <sup>a</sup>               | 6                 | 24  | 9   |     |     |     | 39      | 5                         | 10, 10,<br>8, 9, 11              | 37          |      |       | 11    |
| <i>Rhinolophus<br/>sthenus</i> <sup>a</sup>                 | 14                | 12  | 16  | 6   |     |     | 48      | 7                         | 10, 5, 10,<br>10, 9, 7, 9        | 44          |      |       | 16    |
| <i>Hipposideros<br/>larvatus<br/>(complex)</i> <sup>a</sup> | 4                 | 8   | 12  | 5   | 7   | 5   | 41      | 8                         | 10, 10, 10,<br>10, 7, 7, 1,<br>1 | 40          | 1    | 1     | 14    |
| <i>Rhinolophus<br/>sinicus</i> <sup>a</sup>                 | 4                 | 4   | 4   | 3   | 2   |     | 17      | 3                         | 10, 7, 8                         | 17          |      |       | 8     |
| <i>Myotis laniger</i> <sup>a</sup>                          | 7                 |     | 2   |     |     |     | 9       | 1                         | 9,                               | 9           |      |       |       |
| <i>Rhinolophus<br/>siamensis</i> <sup>a</sup>               | 1                 | 3   | 1   | 2   |     | 1   | 8       | 2                         | 8, 3                             | 8           |      |       | 3     |
| <i>Hipposideros<br/>pomona</i> <sup>a</sup>                 | 1                 |     | 4   | 7   | 1   |     | 13      | 3                         | 8, 5, 8                          | 13          |      |       | 8     |
| <i>Kerivoula<br/>hardwickii</i> <sup>a</sup>                | 1                 |     |     | 1   | 1   |     | 3       | 1                         | 3,                               | 3           |      |       |       |
| <i>Murina cyclotis</i> <sup>a</sup>                         | 1                 | 2   | 2   | 2   |     |     | 7       | 2                         | 7, 3                             | 7           |      |       | 3     |
| <i>Aselliscus<br/>stoliczkanus</i> <sup>a</sup>             | 1                 |     |     | 2   | 1   | 1   | 5       | 2                         | 5, 3                             | 5           |      |       | 3     |
| <i>Myotis<br/>muricola</i> <sup>a</sup>                     |                   | 3   | 1   | 2   | 1   | 1   | 8       | 1                         | 8,                               | 8           |      |       |       |
| <i>Kerivoula sp.</i> <sup>a</sup>                           | 2                 |     |     |     |     |     | 2       | 2                         | 2, 1                             | 2           |      |       | 1     |
| <i>Rhinolophus<br/>paradoxolophus</i> <sup>a</sup>          | 1                 |     |     |     |     |     | 1       | 2                         | 1, 1                             | 1           |      |       | 1     |
| <i>Kerivoula<br/>papillosa</i> <sup>a</sup>                 |                   |     | 1   | 1   |     |     | 2       | 1                         | 2,                               | 2           |      |       |       |
| <i>Tylonycteris<br/>robustula</i> <sup>a</sup>              |                   | 1   |     |     |     |     | 1       | 1                         | 1,                               | 1           |      |       |       |

|                                           |    |    |    |    |    |    |   |    |            |     |   |   |    |
|-------------------------------------------|----|----|----|----|----|----|---|----|------------|-----|---|---|----|
| <i>Harpiocephalus harpia</i> <sup>a</sup> |    |    |    | 1  |    |    | 1 | 2  | 1, 1       | 1   |   |   | 1  |
| <i>Hipposideros armiger</i> <sup>a</sup>  |    |    |    |    | 1  | 2  | 3 | 3  | 2, 1, 1    | 3   |   |   | 1  |
| <i>Rhinolophus pearsonii</i> <sup>a</sup> |    |    |    | 3  |    | 3  | 6 | 3  | 6, 2, 3    | 6   |   |   | 5  |
| <i>Chaerephon plicata</i> <sup>b</sup>    |    |    | 4  |    |    |    | 4 | 3  | 4, 2, 1    | 4   |   | 1 | 2  |
| <i>Taphozous melanopogon</i> <sup>b</sup> |    |    | 9  |    |    |    | 9 | 4  | 8, 1, 1, 1 | 8   | 1 | 1 | 1  |
| Total                                     | 43 | 57 | 65 | 35 | 14 | 13 |   | 56 |            | 219 | 2 | 3 | 78 |

**Table S1. Summary of the bat samples collected in the present study and the pooling strategy used for next-generation sequencing, related to Sample collection and Next generation sequencing of STAR Methods.** Note: <sup>a</sup>Samples were collected from Mengla, Xishuangbanna, Yunan (101.27156323E, 21.91889683N). <sup>b</sup>Samples were collected from Mengla, Xishuangbanna, Yunan (21.5932019N, 101.2200914E). Different colors represent different sample types. Patagium, black; Lung, purple; Liver, blue; Feces, red.

| Primers (nucleotide positions) <sup>a</sup> | Sequence, 5'→3'              | Product length, bp |
|---------------------------------------------|------------------------------|--------------------|
| Forward qF (21344-21366)                    | ACCCAATTCAGTTGTCTTCCTAT      | 146                |
| Reverse qR (21469-21489)                    | TCTAACGATGAGCCTACCCTT        |                    |
| Probe qP (21411-21438)                      | TGCTGTTATGTCTCTTAAGGAGGGACAA |                    |
| Forward qF (YN02-21711)                     | TAATCCACTCTAACCTGGTATA       | 107                |
| Reverse qR (YN02-21795)                     | CAGCATTGATTTATCTACAGTT       |                    |
| Forward qF (YN01-21311)                     | GCACCTCACTCAGGATTAT          | 89                 |
| Reverse qR (YN01-21381)                     | AATAGACTTGACGATCCGA          |                    |
| Forward F6 (23070-23092)                    | TGGTGTCTAACTGATTCAGATA       | 2370               |
| Reverse R6 (25418-25439)                    | TCTCTTTTTAAGGGTTATGATT       |                    |
| Forward F1 (12002-12024)                    | CTTCCATGCAGGGTGCTGTAGA       | 1488               |
| Reverse R1 (13470-13489)                    | CGCACGGTGTAAGACGGGCT         |                    |
| Forward F2 (13159-13180)                    | TGGTCAGGCAATAACAGTTACA       | 2579               |
| Reverse R2 (15715-15737)                    | GATGCGTAAGTGCTATTAAAACA      |                    |
| Forward F3 (15625-15646)                    | AGAGATGTTGACACAGACTTTG       | 1788               |
| Reverse R3 (17390-17412)                    | GTACACATAGTGCTTAGCACGTA      |                    |
| Forward F4 (17321-17345)                    | CAGATATAGTTGTCTTTGATGAAAT    | 1937               |
| Reverse R4 (19236-19257)                    | AGGCAAGTTAAGGTTAGATAGC       |                    |

**Table S2. Oligonucleotide primers designed to detect RmYN02 and to amplify the spike and 1b genes, related to Sanger sequencing of STAR Methods.** <sup>a</sup>Values in parentheses indicate primer positions corresponding to the genome sequence of RmYN02.



| Accession ID   | Virus name                        | Location                      | Collection date | Originating lab                                          | Submitting lab                                           | Authors                                                                              |
|----------------|-----------------------------------|-------------------------------|-----------------|----------------------------------------------------------|----------------------------------------------------------|--------------------------------------------------------------------------------------|
| EPI_ISL_402131 | BetaCoV/bat/Yunnan/RaTG13/2013    | Asia / China / Yunnan / Pu'er | 2013-07-24      | Wuhan Institute of Virology, Chinese Academy of Sciences | Wuhan Institute of Virology, Chinese Academy of Sciences | Yan Zhu, Ping Yu, Bei Li, Ben Hu, Hao-Rui Si, Xing-Lou Yang, Peng Zhou, Zheng-Li Shi |
| EPI_ISL_410539 | BetaCoV/pangolin/Guangxi/P1E/2017 | Asia / China / Guangxi        | 2017            | Beijing Institute of Microbiology and Epidemiology       | Beijing Institute of Microbiology and Epidemiology       | Wu-Chun Cao; Tommy Tsan-Yuk Lam; Na Jia; Ya-Wei Zhang; Jia-Fu Jiang; Bao-Gui Jiang   |
| EPI_ISL_410541 | BetaCoV/pangolin/Guangxi/P5E/2017 | Asia / China / Guangxi        | 2017            | Beijing Institute of Microbiology and Epidemiology       | Beijing Institute of Microbiology and Epidemiology       | Wu-Chun Cao; Tommy Tsan-Yuk Lam; Na Jia; Ya-Wei Zhang; Jia-Fu Jiang; Bao-Gui Jiang   |
| EPI_ISL_410540 | BetaCoV/pangolin/Guangxi/P5L/2017 | Asia / China / Guangxi        | 2017            | Beijing Institute of Microbiology and Epidemiology       | Beijing Institute of Microbiology and Epidemiology       | Wu-Chun Cao; Tommy Tsan-Yuk Lam; Na Jia; Ya-Wei Zhang; Jia-Fu Jiang; Bao-Gui Jiang   |
| EPI_ISL_410538 | BetaCoV/pangolin/Guangxi/P4L/2017 | Asia / China / Guangxi        | 2017            | Beijing Institute of Microbiology and Epidemiology       | Beijing Institute of Microbiology and Epidemiology       | Wu-Chun Cao; Tommy Tsan-Yuk Lam; Na Jia; Ya-Wei Zhang; Jia-Fu Jiang; Bao-Gui Jiang   |

|                |                                     |                          |            |                                                    |                                                    |                                                                                    |
|----------------|-------------------------------------|--------------------------|------------|----------------------------------------------------|----------------------------------------------------|------------------------------------------------------------------------------------|
| EPI_ISL_410543 | BetaCoV/pangolin/Guangxi/P3B/2017   | Asia / China / Guangxi   | 2017       | Beijing Institute of Microbiology and Epidemiology | Beijing Institute of Microbiology and Epidemiology | Wu-Chun Cao; Tommy Tsan-Yuk Lam; Na Jia; Ya-Wei Zhang; Jia-Fu Jiang; Bao-Gui Jiang |
| EPI_ISL_410542 | BetaCoV/pangolin/Guangxi/P2V/2017   | Asia / China / Guangxi   | 2017       | Beijing Institute of Microbiology and Epidemiology | Beijing Institute of Microbiology and Epidemiology | Wu-Chun Cao; Tommy Tsan-Yuk Lam; Na Jia; Ya-Wei Zhang; Jia-Fu Jiang; Bao-Gui Jiang |
| EPI_ISL_410544 | BetaCoV/pangolin/Guangdong/P2S/2019 | Asia / China / Guangdong | 2019       | Beijing Institute of Microbiology and Epidemiology | Beijing Institute of Microbiology and Epidemiology | Wu-Chun Cao; Tommy Tsan-Yuk Lam; Na Jia; Ya-Wei Zhang; Jia-Fu Jiang; Bao-Gui Jiang |
| MT084071.1     | MP789                               | China                    | 2019-03-29 |                                                    | Chinese Academy of Fishery Sciences (SCSFRI, CAFS) | Jiang, J.-Z., Liu, P. and Chen, J.-P.                                              |

**Table S3. Acknowledgement of sharing of SARS-CoV-2 genome sequences from the GISAID and GenBank databases, related to Figure1. We gratefully thank the authors listed below for sharing their genomic sequences of coronaviruses analyzed in this study.**
